# Supplementary material for: Expression and Functional Role of Sox9 in Human Epidermal Keratinocytes
Source: PLoS One. 2013 Jan 18;8(1):e54355. doi: 10.1371/journal.pone.0054355 (PMC3548846; doi:10.1371/journal.pone.0054355)
Supplement: Table S1 — Raw data of TUNEL assay. Keratinocytes were transduced with adenovirus, then UVB-irradiated. Apoptotic cells were counted and represented as percent of total cells. (XLSX) [file pone.0054355.s005.xlsx]

## Sheet: Sheet1
	Ad/GFP	Ad/GFP-Sox9	Ad/miR-Sox9-1	Ad/miR-Sox9-2
DAPI-1	16	6	13	30
Tunel-1	69	70	47	49
% of apoptotic cells-1	23.1884	8.57143	27.6596	61.2245
DAPI-2	20	9	19	38
Tunel-2	65	63	55	51
% of apoptotic cells-2	30.7692	14.2857	34.5455	74.5098
DAPI-3	11	4	27	33
Tunel-3	62	64	64	54
% of apoptotic cells-3	17.7419	6.25	42.1875	61.1111
	Ad/GFP	Ad/GFP-Sox9	Ad/miR-Sox9-1	Ad/miR-Sox9-2
	23.1884	8.57143	27.6596	61.2245
	30.7692	14.2857	34.5455	74.5098
	17.7419	6.25	42.1875	61.1111
mean	23.8999	9.70238	34.7975	65.6151
SD	6.54272	4.13551	7.26724	7.70322
p value		0.010356	0.249084	0.00194562
	Ad/GFP	Ad/GFP-Sox9	Ad/miR-Sox9-1	Ad/miR-Sox9-2
% apoptotic cells	23.8999	9.70238	34.7975	65.6151
SD	6.54272	4.13551	7.26724	7.70322
